# Supplementary material for: Sex-specific Relationships Between HDL-Cholesterol Levels and 10-year Mortality in Individuals with Atherosclerotic Cardiovascular Disease: A Nationwide Cohort Study of South Koreans
Source: Preprints.org preprint supplement (doi:10.20944/preprints202311.0373.v1), 2023-11-06
Supplement: Supplementary file 3 [file supplementary]

**Table S1.** The missing numbers

|  | **Total**  **(N = 1,711,548)** | **Low**  **HDL-C**  **(N = 477,346)** | **High**  **HDL-C**  **(N = 1,215,741)** | **Extremely high**  **HDL-C**  **(N = 18,461)** |
| --- | --- | --- | --- | --- |
| Body mass index, N (%) | 1158 (0.07) | 566 (0.12) | 588 (0.05) | 4 (0.02) |
| Male, N | 411 | 134 | 276 | 1 |
| Female, N | 747 | 432 | 312 | 3 |
| Waist circumference, N (%) | 1185 (0.07) | 553 (0.12) | 628 (0.05) | 4 (0.02) |
| Male, N | 444 | 128 | 315 | 1 |
| Female, N | 741 | 425 | 313 | 3 |
| Smoking, N (%) | 3771 (0.22) | 983 (0.21) | 2757 (0.23) | 31 (0.17) |
| Male, N | 1555 | 301 | 1247 | 7 |
| Female, N | 2216 | 682 | 1510 | 24 |
| Alcohol, N (%) | 4127 (0.24) | 973 (0.20) | 3064 (0.25) | 90 (0.49) |
| Male, N | 1821 | 316 | 1472 | 33 |
| Female, N | 2306 | 657 | 1592 | 57 |
